# Supplementary material for: Mitochondrial Lon protease is a gatekeeper for proteins newly imported into the matrix
Source: PubMed Central journal article supplement (PMC8368198; doi:10.1038/s42003-021-02498-z), 2021-08-16
Supplement: 42003_2021_2498_MOESM2_ESM.pdf [file 42003_2021_2498_MOESM2_ESM.pdf]

**File Name:** Supplementary Data 1.

**Description:** Mass spectrometry analysis of the aggregated mitochondrial proteins from LONP1 knockdown HeLa cells. The list of the aggregated mitochondrial proteins from LONP1 knockdown HeLa cells is available as a Supplementary Data 1.

**File Name:** Supplementary Data 2.

**Description:** Mass spectrometry analysis of the aggregated mitochondrial proteins from LONP1 knockdown HEK293 cells. The list of the aggregated mitochondrial proteins from LONP1 knockdown HEK293 cells is available as a Supplementary Data 2.

**File Name:** Supplementary Data 3.

**Description:** The list of materials used in experiments is available as a Supplementary Data 3.

**File Name:** Supplementary Data 4.

**Description:** Source data for the graphs is available as a Supplementary Data 4.
